# Supplementary material
Source: MDPI journal article supplement (https://www.mdpi.com/2076-3417/13/2/768)
Supplement: s1 [file s1]

Table S1. (a) The weights of the 14 landslide conditioning factors. Only the first 7 factors were used in model 1.

| No | Landslide Conditioning Factor    | Class             | Landslide Number | Total pixel in class | % pixel in class | Total Pixel area (m <sup>2</sup> ) | Mean landslide density (per m <sup>2</sup> ) | Landslide density in class (per m <sup>2</sup> ) | Weight |
|----|----------------------------------|-------------------|------------------|----------------------|------------------|------------------------------------|----------------------------------------------|--------------------------------------------------|--------|
| 1  | Topographic Position Index (TPI) | Valley            | 20               | 508875               | 5.25             | 12721875                           | 2.68E-06                                     | 1.57E-06                                         | -0.53  |
|    |                                  | Lower Slope       | 80               | 1534798              | 15.83            | 38369950                           | 2.68E-06                                     | 2.08E-06                                         | -0.25  |
|    |                                  | Flat Slope        | 1                | 3772697              | 38.90            | 94317425                           | 2.68E-06                                     | 1.06E-08                                         | -5.53  |
|    |                                  | Middle Slope      | 401              | 1930231              | 19.90            | 48255775                           | 2.68E-06                                     | 8.31E-06                                         | 1.13   |
|    |                                  | Upper Slope       | 98               | 1475735              | 15.22            | 36893375                           | 2.68E-06                                     | 2.66E-06                                         | -0.01  |
|    |                                  | Ridge             | 50               | 475978               | 4.91             | 11899450                           | 2.68E-06                                     | 4.20E-06                                         | 0.45   |
| 2  | Slope                            | 0 - 5             | 9                | 6381891              | 65.80            | 159547275                          | 2.68E-06                                     | 5.64E-08                                         | -3.86  |
|    |                                  | 5 - 15            | 117              | 1898655              | 19.58            | 47466375                           | 2.68E-06                                     | 2.46E-06                                         | -0.08  |
|    |                                  | 15 - 25           | 229              | 841770               | 8.68             | 21044250                           | 2.68E-06                                     | 1.09E-05                                         | 1.40   |
|    |                                  | 25 - 35           | 201              | 475209               | 4.90             | 11880225                           | 2.68E-06                                     | 1.69E-05                                         | 1.84   |
|    |                                  | 35 - 60           | 93               | 99929                | 1.03             | 2498225                            | 2.68E-06                                     | 3.72E-05                                         | 2.63   |
|    |                                  | > 60              | 1                | 860                  | 0.01             | 21500                              | 2.68E-06                                     | 4.65E-05                                         | 2.85   |
| 3  | Distance to Lineament            | 0 - 125 m         | 118              | 1113719              | 11.48            | 27842975                           | 2.68E-06                                     | 4.24E-06                                         | 0.46   |
|    |                                  | 125 - 250 m       | 117              | 1095919              | 11.30            | 27397975                           | 2.68E-06                                     | 4.27E-06                                         | 0.47   |
|    |                                  | 250 - 500 m       | 164              | 1827880              | 18.85            | 45697000                           | 2.68E-06                                     | 3.59E-06                                         | 0.29   |
|    |                                  | 500 - 1000 m      | 149              | 2384978              | 24.59            | 59624450                           | 2.68E-06                                     | 2.50E-06                                         | -0.07  |
|    |                                  | > 1000 m          | 102              | 3275818              | 33.78            | 81895450                           | 2.68E-06                                     | 1.25E-06                                         | -0.77  |
| 4  | Distance to Road                 | 0 - 25 m          | 306              | 4466411              | 46.05            | 111660275                          | 2.68E-06                                     | 2.74E-06                                         | 0.02   |
|    |                                  | 25 - 50 m         | 164              | 2053554              | 21.17            | 51338850                           | 2.68E-06                                     | 3.19E-06                                         | 0.18   |
|    |                                  | 50 - 75 m         | 73               | 996370               | 10.27            | 24909250                           | 2.68E-06                                     | 2.93E-06                                         | 0.09   |
|    |                                  | 75 - 100 m        | 40               | 595063               | 6.14             | 14876575                           | 2.68E-06                                     | 2.69E-06                                         | 0.00   |
|    |                                  | 100 - 125 m       | 14               | 374598               | 3.86             | 9364950                            | 2.68E-06                                     | 1.49E-06                                         | -0.58  |
|    |                                  | 125 - 150 m       | 10               | 253123               | 2.61             | 6328075                            | 2.68E-06                                     | 1.58E-06                                         | -0.53  |
|    |                                  | > 150 m           | 43               | 959195               | 9.89             | 23979875                           | 2.68E-06                                     | 1.79E-06                                         | -0.40  |
| 5  | Surface Geology                  | Alluvium          | 9                | 2343724              | 24.17            | 58593100                           | 2.68E-06                                     | 1.54E-07                                         | -2.86  |
|    |                                  | Residual Soil -KH | 447              | 2449847              | 25.26            | 61246175                           | 2.68E-06                                     | 7.30E-06                                         | 1.00   |
|    |                                  | Mined-out         | 12               | 1827169              | 18.84            | 45679225                           | 2.68E-06                                     | 2.63E-07                                         | -2.32  |
|    |                                  | Residual Soil- HS | 38               | 385718               | 3.98             | 9642950                            | 2.68E-06                                     | 3.94E-06                                         | 0.39   |
|    |                                  | Residual Soil- Gr | 127              | 2257866              | 23.28            | 56446650                           | 2.68E-06                                     | 2.25E-06                                         | -0.18  |

|      |                               |                   |     |         |       |           |          |          |       |
|------|-------------------------------|-------------------|-----|---------|-------|-----------|----------|----------|-------|
|      |                               | Residual Soil -DS | 17  | 218731  | 2.26  | 5468275   | 2.68E-06 | 3.11E-06 | 0.15  |
|      |                               | Water body        | 0   | 177569  | 1.83  | 4439225   | 2.68E-06 | 0.00E+00 | 0.00  |
|      |                               | Landfill          | 0   | 37690   | 0.39  | 942250    | 2.68E-06 | 0.00E+00 | 0.00  |
| 6    | Elevation                     | 0 - 50 m          | 121 | 4812689 | 49.62 | 120317225 | 2.68E-06 | 1.01E-06 | -0.98 |
|      |                               | 50 - 100 m        | 447 | 4081859 | 42.09 | 102046475 | 2.68E-06 | 4.38E-06 | 0.49  |
|      |                               | 100 - 150 m       | 65  | 559180  | 5.77  | 13979500  | 2.68E-06 | 4.65E-06 | 0.55  |
|      |                               | 150 - 200 m       | 16  | 166365  | 1.72  | 4159125   | 2.68E-06 | 3.85E-06 | 0.36  |
|      |                               | >200 m            | 1   | 78221   | 0.81  | 1955525   | 2.68E-06 | 5.11E-07 | -1.66 |
| 7    | Surface Roughness             | Low               | 206 | 2289706 | 23.61 | 57242650  | 2.68E-06 | 3.60E-06 | 0.29  |
|      |                               | Moderate          | 344 | 4808678 | 49.58 | 120216950 | 2.68E-06 | 2.86E-06 | 0.07  |
|      |                               | High              | 100 | 2599930 | 26.81 | 64998250  | 2.68E-06 | 1.54E-06 | -0.56 |
| 8    | Stream Power Index (SPI)      | Very low          | 12  | 11033   | 0.11  | 275825    | 2.68E-06 | 4.35E-05 | 2.79  |
|      |                               | Low               | 89  | 212168  | 2.19  | 5304200   | 2.68E-06 | 1.68E-05 | 1.83  |
|      |                               | Moderate          | 32  | 321765  | 3.32  | 8044125   | 2.68E-06 | 3.98E-06 | 0.39  |
|      |                               | High              | 380 | 8840351 | 91.15 | 221008775 | 2.68E-06 | 1.72E-06 | -0.44 |
|      |                               | Very high         | 137 | 312997  | 3.23  | 7824925   | 2.68E-06 | 1.75E-05 | 1.88  |
| 9(a) | Slope aspect (granite)        | North             | 14  | 336255  | 3.47  | 8406375   | 1.86E-06 | 1.67E-06 | -0.11 |
|      |                               | Northeast         | 11  | 305244  | 3.15  | 7631100   | 1.86E-06 | 1.44E-06 | -0.26 |
|      |                               | East              | 15  | 374322  | 3.86  | 9358050   | 1.86E-06 | 1.60E-06 | -0.15 |
|      |                               | Southeast         | 13  | 328917  | 3.39  | 8222925   | 1.86E-06 | 1.58E-06 | -0.16 |
|      |                               | South             | 17  | 345840  | 3.57  | 8646000   | 1.86E-06 | 1.97E-06 | 0.05  |
|      |                               | Southwest         | 13  | 340488  | 3.51  | 10556050  | 1.86E-06 | 1.23E-06 | -0.41 |
|      |                               | West              | 31  | 422242  | 4.35  | 9004250   | 1.86E-06 | 3.44E-06 | 0.61  |
|      |                               | Northwest         | 18  | 360170  | 3.71  | 9004250   | 1.86E-06 | 2.00E-06 | 0.07  |
| 9(b) | Slope aspect (meta-sediments) | North             | 59  | 475627  | 4.90  | 11890675  | 5.23E-06 | 4.96E-06 | -0.05 |
|      |                               | Northeast         | 54  | 480686  | 4.96  | 12017150  | 5.23E-06 | 4.49E-06 | -0.15 |
|      |                               | East              | 65  | 504788  | 5.20  | 12619700  | 5.23E-06 | 5.15E-06 | -0.02 |
|      |                               | Southeast         | 59  | 498859  | 5.14  | 12471475  | 5.23E-06 | 4.73E-06 | -0.10 |
|      |                               | South             | 60  | 515505  | 5.32  | 12887625  | 5.23E-06 | 4.66E-06 | -0.12 |
|      |                               | Southwest         | 75  | 480983  | 4.96  | 12024575  | 5.23E-06 | 6.24E-06 | 0.18  |
|      |                               | West              | 71  | 483308  | 4.98  | 12082700  | 5.23E-06 | 5.88E-06 | 0.12  |
|      |                               | Northwest         | 66  | 450861  | 4.65  | 11271525  | 5.23E-06 | 5.86E-06 | 0.11  |
| 10   | Topographic Wetness Index     | 0 to 0.200        | 575 | 1902580 | 19.62 | 47564500  | 2.68E-06 | 1.21E-05 | 1.51  |
|      |                               | 0.200 to 0.278    | 62  | 2512812 | 25.91 | 62820300  | 2.68E-06 | 9.87E-07 | -1.00 |
|      |                               | 0.278 to 0.349    | 9   | 2957172 | 30.49 | 73929300  | 2.68E-06 | 1.22E-07 | -3.09 |

|    |                                                        |                                |     |         |       |           |          |          |       |
|----|--------------------------------------------------------|--------------------------------|-----|---------|-------|-----------|----------|----------|-------|
|    | (TWI)                                                  | 0.349-0.443                    | 3   | 1950988 | 20.12 | 48774700  | 2.68E-06 | 6.15E-08 | -3.77 |
|    |                                                        | 0.443-1.000                    | 1   | 374762  | 3.86  | 9369050   | 2.68E-06 | 1.07E-07 | -3.22 |
| 11 | Normalized<br>Difference<br>Vegetation<br>Index (NDVI) | water                          | 1   | 195576  | 2.02  | 4889400   | 2.68E-06 | 2.05E-07 | -2.57 |
|    |                                                        | Barren, road, built up<br>area | 14  | 1634010 | 16.85 | 40850250  | 2.68E-06 | 3.43E-07 | -2.06 |
|    |                                                        | Sparse vegetation              | 43  | 2384786 | 24.59 | 59619650  | 2.68E-06 | 7.21E-07 | -1.31 |
|    |                                                        | Low vegetation                 | 141 | 2117228 | 21.83 | 52930700  | 2.68E-06 | 2.66E-06 | -0.01 |
|    |                                                        | Moderate vegetation            | 210 | 1699225 | 17.52 | 42480625  | 2.68E-06 | 4.94E-06 | 0.61  |
|    |                                                        | Dense vegetation               | 241 | 1667489 | 17.19 | 41687225  | 2.68E-06 | 5.78E-06 | 0.77  |
|    |                                                        |                                |     |         |       |           |          |          |       |
| 12 | Distance to<br>Streams                                 | 0 - 25 m                       | 100 | 1924565 | 19.84 | 48114125  | 2.68E-06 | 2.08E-06 | -0.25 |
|    |                                                        | 25 - 50 m                      | 103 | 1563080 | 16.12 | 39077000  | 2.68E-06 | 2.64E-06 | -0.02 |
|    |                                                        | 50 - 75 m                      | 87  | 1310577 | 13.51 | 32764425  | 2.68E-06 | 2.66E-06 | -0.01 |
|    |                                                        | 75 - 100 m                     | 86  | 1063037 | 10.96 | 26575925  | 2.68E-06 | 3.24E-06 | 0.19  |
|    |                                                        | > 100 m                        | 274 | 3837055 | 39.56 | 95926375  | 2.68E-06 | 2.86E-06 | 0.06  |
| 13 | Slope Curvature                                        | Concave                        | 132 | 692424  | 7.14  | 17310600  | 2.68E-06 | 7.63E-06 | 1.05  |
|    |                                                        | Flat                           | 374 | 8459242 | 87.22 | 211481050 | 2.68E-06 | 1.77E-06 | -0.42 |
|    |                                                        | Convex                         | 144 | 546648  | 5.64  | 13666200  | 2.68E-06 | 1.05E-05 | 1.37  |
| 14 | Bedrock<br>Geology                                     | Kenny Hill Fm.                 | 454 | 3173147 | 32.72 | 79328675  | 2.68E-06 | 5.72E-06 | 0.76  |
|    |                                                        | Limestone                      | 10  | 3054520 | 31.50 | 76363000  | 2.68E-06 | 1.31E-07 | -3.02 |
|    |                                                        | Granite                        | 131 | 2788209 | 28.75 | 69705225  | 2.68E-06 | 1.88E-06 | -0.36 |
|    |                                                        | Hawthornden Schist             | 38  | 438623  | 4.52  | 10965575  | 2.68E-06 | 3.47E-06 | 0.26  |
|    |                                                        | Dinding Schist                 | 17  | 243815  | 2.51  | 6095375   | 2.68E-06 | 2.79E-06 | 0.04  |

Table S1. (b) The weights for model A where all the 377 landslide points in zone A were used as the training dataset.

| No | Landslide Conditioning Factor    | Class             | Landslide Number | Total pixel in class | Total Pixel area (m <sup>2</sup> ) | Mean landslide density (per m <sup>2</sup> ) | Landslide density in class (per m <sup>2</sup> ) | Weight |
|----|----------------------------------|-------------------|------------------|----------------------|------------------------------------|----------------------------------------------|--------------------------------------------------|--------|
| 1  | Topographic Position Index (TPI) | Valley            | 12               | 250432               | 6260800                            | 3.08475E-06                                  | 1.92E-06                                         | -0.48  |
|    |                                  | Lower Slope       | 44               | 763301               | 19082525                           | 3.08475E-06                                  | 2.31E-06                                         | -0.29  |
|    |                                  | Flat Slope        | 1                | 1888633              | 47215825                           | 3.08475E-06                                  | 2.12E-08                                         | -4.98  |
|    |                                  | Middle Slope      | 235              | 1004831              | 25120775                           | 3.08475E-06                                  | 9.35E-06                                         | 1.11   |
|    |                                  | Upper Slope       | 53               | 738471               | 18461775                           | 3.08475E-06                                  | 2.87E-06                                         | -0.07  |
|    |                                  | Ridge             | 32               | 242893               | 6072325                            | 3.08475E-06                                  | 5.27E-06                                         | 0.54   |
| 2  | Slope                            | 0 - 5             | 3                | 3175874              | 79396850                           | 3.08475E-06                                  | 3.78E-08                                         | -4.40  |
|    |                                  | 5 - 15            | 51               | 962713               | 24067825                           | 3.08475E-06                                  | 2.12E-06                                         | -0.38  |
|    |                                  | 15 - 25           | 147              | 434828               | 10870700                           | 3.08475E-06                                  | 1.35E-05                                         | 1.48   |
|    |                                  | 25 - 35           | 117              | 261439               | 6535975                            | 3.08475E-06                                  | 1.79E-05                                         | 1.76   |
|    |                                  | 35 - 60           | 59               | 53365                | 1334125                            | 3.08475E-06                                  | 4.42E-05                                         | 2.66   |
|    |                                  | > 60              | 0                | 342                  | 8550                               | 3.08475E-06                                  | 0.00E+00                                         | 0.00   |
| 3  | Distance to Lineament            | 0 - 125 m         | 71               | 632899               | 15822475                           | 3.08475E-06                                  | 4.49E-06                                         | 0.37   |
|    |                                  | 125 - 250 m       | 78               | 596227               | 14905675                           | 3.08475E-06                                  | 5.23E-06                                         | 0.53   |
|    |                                  | 250 - 500 m       | 90               | 909138               | 22728450                           | 3.08475E-06                                  | 3.96E-06                                         | 0.25   |
|    |                                  | 500 - 1000 m      | 81               | 1094032              | 27350800                           | 3.08475E-06                                  | 2.96E-06                                         | -0.04  |
|    |                                  | > 1000 m          | 57               | 1656265              | 41406625                           | 3.08475E-06                                  | 1.38E-06                                         | -0.81  |
| 4  | Distance to Road                 | 0 - 25 m          | 176              | 2241678              | 56041950                           | 3.08475E-06                                  | 3.14E-06                                         | 0.02   |
|    |                                  | 25 - 50 m         | 87               | 1040970              | 26024250                           | 3.08475E-06                                  | 3.34E-06                                         | 0.08   |
|    |                                  | 50 - 75 m         | 49               | 509644               | 12741100                           | 3.08475E-06                                  | 3.85E-06                                         | 0.22   |
|    |                                  | 75 - 100 m        | 30               | 301272               | 7531800                            | 3.08475E-06                                  | 3.98E-06                                         | 0.26   |
|    |                                  | 100 - 125 m       | 9                | 185533               | 4638325                            | 3.08475E-06                                  | 1.94E-06                                         | -0.46  |
|    |                                  | 125 - 150 m       | 3                | 123014               | 3075350                            | 3.08475E-06                                  | 9.75E-07                                         | -1.15  |
|    |                                  | > 150 m           | 23               | 486450               | 12161250                           | 3.08475E-06                                  | 1.89E-06                                         | -0.49  |
| 5  | Surface Geology                  | Alluvium          | 6                | 1202082              | 30052050                           | 3.08475E-06                                  | 2.00E-07                                         | -2.74  |
|    |                                  | Residual Soil -KH | 280              | 1277497              | 31937425                           | 3.08475E-06                                  | 8.77E-06                                         | 1.04   |
|    |                                  | Mined-out         | 3                | 864543               | 21613575                           | 3.08475E-06                                  | 1.39E-07                                         | -3.10  |
|    |                                  | Residual Soil- HS | 20               | 186068               | 4651700                            | 3.08475E-06                                  | 4.30E-06                                         | 0.33   |
|    |                                  | Residual Soil- Gr | 56               | 1150727              | 28768175                           | 3.08475E-06                                  | 1.95E-06                                         | -0.46  |

|   |                      |                      |     |         |          |             |          |       |
|---|----------------------|----------------------|-----|---------|----------|-------------|----------|-------|
|   |                      | Residual Soil<br>-DS | 12  | 103692  | 2592300  | 3.08475E-06 | 4.63E-06 | 0.41  |
|   |                      | Water body           | 0   | 80260   | 2006500  | 3.08475E-06 | 0.00E+00 | 0.00  |
|   |                      | Landfill             | 0   | 23692   | 592300   | 3.08475E-06 | 0.00E+00 | 0.00  |
| 6 | Elevation            | 0 - 50 m             | 64  | 2359895 | 58997375 | 3.08475E-06 | 1.08E-06 | -1.05 |
|   |                      | 50 - 100 m           | 263 | 2074042 | 51851050 | 3.08475E-06 | 5.07E-06 | 0.50  |
|   |                      | 100 - 150 m          | 44  | 290302  | 7257550  | 3.08475E-06 | 6.06E-06 | 0.68  |
|   |                      | 150 - 200 m          | 6   | 104622  | 2615550  | 3.08475E-06 | 2.29E-06 | -0.30 |
|   |                      | >200 m               | 0   | 59700   | 1492500  | 3.08475E-06 | 0.00E+00 | 0.00  |
| 7 | Surface<br>Roughness | Low                  | 123 | 1139765 | 28494125 | 3.08475E-06 | 4.32E-06 | 0.34  |
|   |                      | Moderate             | 199 | 2434279 | 60856975 | 3.08475E-06 | 3.27E-06 | 0.06  |
|   |                      | High                 | 55  | 1314517 | 32862925 | 3.08475E-06 | 1.67E-06 | -0.61 |

Table S1. (c) The weights for model B where all the 274 landslide points in zone B were used as the training dataset.

| No | Landslide Conditioning Factor    | Class             | Landslide Number | Total pixel in class | Total Pixel area (m <sup>2</sup> ) | Mean landslide density (per m <sup>2</sup> ) | Landslide density in class (per m <sup>2</sup> ) | Weight |
|----|----------------------------------|-------------------|------------------|----------------------|------------------------------------|----------------------------------------------|--------------------------------------------------|--------|
| 1  | Topographic Position Index (TPI) | Valley            | 9                | 258394               | 6459850                            | 2.28E-06                                     | 1.39E-06                                         | -0.49  |
|    |                                  | Lower Slope       | 40               | 771281               | 19282025                           | 2.28E-06                                     | 2.07E-06                                         | -0.09  |
|    |                                  | Flat Slope        | 2                | 1883662              | 47091550                           | 2.28E-06                                     | 4.25E-08                                         | -3.98  |
|    |                                  | Middle Slope      | 161              | 925219               | 23130475                           | 2.28E-06                                     | 6.96E-06                                         | 1.12   |
|    |                                  | Upper Slope       | 46               | 737130               | 18428250                           | 2.28E-06                                     | 2.50E-06                                         | 0.09   |
|    |                                  | Ridge             | 16               | 233051               | 5826275                            | 2.28E-06                                     | 2.75E-06                                         | 0.19   |
| 2  | Slope                            | 0 - 5             | 3                | 3205224              | 80130600                           | 2.28E-06                                     | 3.74E-08                                         | -4.11  |
|    |                                  | 5 - 15            | 55               | 935773               | 23394325                           | 2.28E-06                                     | 2.35E-06                                         | 0.03   |
|    |                                  | 15 - 25           | 81               | 406890               | 10172250                           | 2.28E-06                                     | 7.96E-06                                         | 1.25   |
|    |                                  | 25 - 35           | 93               | 213768               | 5344200                            | 2.28E-06                                     | 1.74E-05                                         | 2.03   |
|    |                                  | 35 - 60           | 42               | 46564                | 1164100                            | 2.28E-06                                     | 3.61E-05                                         | 2.76   |
|    |                                  | > 60              | 0                | 518                  | 12950                              | 2.28E-06                                     | 0.00E+00                                         | 0.00   |
| 3  | Distance to Lineament            | 0 - 125 m         | 49               | 480696               | 12017400                           | 2.28E-06                                     | 4.08E-06                                         | 0.58   |
|    |                                  | 125 - 250 m       | 38               | 499554               | 12488850                           | 2.28E-06                                     | 3.04E-06                                         | 0.29   |
|    |                                  | 250 - 500 m       | 73               | 918611               | 22965275                           | 2.28E-06                                     | 3.18E-06                                         | 0.33   |
|    |                                  | 500 - 1000 m      | 69               | 1290724              | 32268100                           | 2.28E-06                                     | 2.14E-06                                         | -0.06  |
|    |                                  | > 1000 m          | 45               | 1619152              | 40478800                           | 2.28E-06                                     | 1.11E-06                                         | -0.72  |
| 4  | Distance to Road                 | 0 - 25 m          | 132              | 2224428              | 55610700                           | 2.28E-06                                     | 2.37E-06                                         | 0.04   |
|    |                                  | 25 - 50 m         | 75               | 1012420              | 25310500                           | 2.28E-06                                     | 2.96E-06                                         | 0.26   |
|    |                                  | 50 - 75 m         | 23               | 486590               | 12164750                           | 2.28E-06                                     | 1.89E-06                                         | -0.19  |
|    |                                  | 75 - 100 m        | 13               | 293680               | 7342000                            | 2.28E-06                                     | 1.77E-06                                         | -0.25  |
|    |                                  | 100 - 125 m       | 6                | 188988               | 4724700                            | 2.28E-06                                     | 1.27E-06                                         | -0.58  |
|    |                                  | 125 - 150 m       | 6                | 130060               | 3251500                            | 2.28E-06                                     | 1.85E-06                                         | -0.21  |
|    |                                  | > 150 m           | 19               | 472571               | 11814275                           | 2.28E-06                                     | 1.61E-06                                         | -0.35  |
| 5  | Surface Geology                  | Alluvium          | 2                | 1141513              | 28537825                           | 2.28E-06                                     | 7.01E-08                                         | -3.48  |
|    |                                  | Residual Soil -KH | 170              | 1172209              | 29305225                           | 2.28E-06                                     | 5.80E-06                                         | 0.93   |
|    |                                  | Mined-out         | 9                | 962303               | 24057575                           | 2.28E-06                                     | 3.74E-07                                         | -1.81  |
|    |                                  | Residual Soil-HS  | 18               | 199579               | 4989475                            | 2.28E-06                                     | 3.61E-06                                         | 0.46   |
|    |                                  | Residual Soil-Gr  | 70               | 1106817              | 27670425                           | 2.28E-06                                     | 2.53E-06                                         | 0.10   |
|    |                                  | Residual Soil -DS | 5                | 115015               | 2875375                            | 2.28E-06                                     | 1.74E-06                                         | -0.27  |

|   |                      |             |     |         |          |          |          |       |
|---|----------------------|-------------|-----|---------|----------|----------|----------|-------|
|   |                      | Water body  | 0   | 97303   | 2432575  | 2.28E-06 | 0.00E+00 | 0.00  |
|   |                      | Landfill    | 0   | 13998   | 349950   | 2.28E-06 | 0.00E+00 | 0.00  |
| 6 | Elevation            | 0 - 50 m    | 59  | 2452508 | 61312700 | 2.28E-06 | 9.62E-07 | -0.86 |
|   |                      | 50 - 100 m  | 182 | 2007125 | 50178125 | 2.28E-06 | 3.63E-06 | 0.46  |
|   |                      | 100 - 150 m | 23  | 268854  | 6721350  | 2.28E-06 | 3.42E-06 | 0.41  |
|   |                      | 150 - 200 m | 9   | 61739   | 1543475  | 2.28E-06 | 5.83E-06 | 0.94  |
|   |                      | >200 m      | 1   | 18511   | 462775   | 2.28E-06 | 2.16E-06 | -0.05 |
|   |                      |             |     |         |          |          |          |       |
| 7 | Surface<br>Roughness | Low         | 94  | 1149718 | 28742950 | 2.28E-06 | 3.27E-06 | 0.36  |
|   |                      | Moderate    | 134 | 2373883 | 59347075 | 2.28E-06 | 2.26E-06 | -0.01 |
|   |                      | High        | 46  | 1285136 | 32128400 | 2.28E-06 | 1.43E-06 | -0.46 |

Table S2. Comparison of the area extent of the landslide conditioning factor classes in zone A and zone B.

| No | Landslide Conditioning Factor    | Class             | Total Pixel in Zone A (m <sup>2</sup> ) | Total Pixel in Zone B (m <sup>2</sup> ) | Difference = (A - B)/A, (%) |
|----|----------------------------------|-------------------|-----------------------------------------|-----------------------------------------|-----------------------------|
| 1  | Topographic Position Index (TPI) | Valley            | 6260800                                 | 6459850                                 | -3.2                        |
|    |                                  | Lower Slope       | 19082525                                | 19282025                                | -1.0                        |
|    |                                  | Flat Slope        | 47215825                                | 47091550                                | 0.3                         |
|    |                                  | Middle Slope      | 25120775                                | 23130475                                | 7.9                         |
|    |                                  | Upper Slope       | 18461775                                | 18428250                                | 0.2                         |
|    |                                  | Ridge             | 6072325                                 | 5826275                                 | 4.1                         |
| 2  | Slope                            | 0 - 5             | 79396850                                | 80130600                                | -0.9                        |
|    |                                  | 5 - 15            | 24067825                                | 23394325                                | 2.8                         |
|    |                                  | 15 - 25           | 10870700                                | 10172250                                | 6.4                         |
|    |                                  | 25 - 35           | 6535975                                 | 5344200                                 | 18.2                        |
|    |                                  | 35 - 60           | 1334125                                 | 1164100                                 | 12.7                        |
|    |                                  | > 60              | 8550                                    | 12950                                   | -51.5                       |
| 3  | Distance to Lineament            | 0 - 125 m         | 15822475                                | 12017400                                | 24.0                        |
|    |                                  | 125 - 250 m       | 14905675                                | 12488850                                | 16.2                        |
|    |                                  | 250 - 500 m       | 22728450                                | 22965275                                | -1.0                        |
|    |                                  | 500 - 1000 m      | 27350800                                | 32268100                                | -18.0                       |
|    |                                  | > 1000 m          | 41406625                                | 40478800                                | 2.2                         |
| 4  | Distance to Road                 | 0 - 25 m          | 56041950                                | 55610700                                | 0.8                         |
|    |                                  | 25 - 50 m         | 26024250                                | 25310500                                | 2.7                         |
|    |                                  | 50 - 75 m         | 12741100                                | 12164750                                | 4.5                         |
|    |                                  | 75 - 100 m        | 7531800                                 | 7342000                                 | 2.5                         |
|    |                                  | 100 - 125 m       | 4638325                                 | 4724700                                 | -1.9                        |
|    |                                  | 125 - 150 m       | 3075350                                 | 3251500                                 | -5.7                        |
|    |                                  | > 150 m           | 12161250                                | 11814275                                | 2.9                         |
| 5  | Surface Geology                  | Alluvium          | 30052050                                | 28537825                                | 5.0                         |
|    |                                  | Residual Soil -KH | 31937425                                | 29305225                                | 8.2                         |
|    |                                  | Mined-out         | 21613575                                | 24057575                                | -11.3                       |
|    |                                  | Residual Soil-HS  | 4651700                                 | 4989475                                 | -7.3                        |
|    |                                  | Residual Soil-Gr  | 28768175                                | 27670425                                | 3.8                         |
|    |                                  | Residual Soil -DS | 2592300                                 | 2875375                                 | -10.9                       |
|    |                                  | Water body        | 2006500                                 | 2432575                                 | -21.2                       |
|    |                                  | Landfill          | 592300                                  | 349950                                  | 40.9                        |
| 6  | Elevation                        | 0 - 50 m          | 58997375                                | 61312700                                | -3.9                        |
|    |                                  | 50 - 100 m        | 51851050                                | 50178125                                | 3.2                         |
|    |                                  | 100 - 150 m       | 7257550                                 | 6721350                                 | 7.4                         |
|    |                                  | 150 - 200 m       | 2615550                                 | 1543475                                 | 41.0                        |
|    |                                  | >200 m            | 1492500                                 | 462775                                  | 69.0                        |
| 7  | Surface Roughness                | Low               | 28494125                                | 28742950                                | -0.9                        |
|    |                                  | Moderate          | 60856975                                | 59347075                                | 2.5                         |
|    |                                  | High              | 32862925                                | 32128400                                | 2.2                         |
